# Supplementary material for: A Signature of Exaggerated Adipose Tissue Dysfunction in Type 2 Diabetes Is Linked to Low Plasma Adiponectin and Increased Transcriptional Activation of Proteasomal Degradation in Muscle
Source: MDPI journal article supplement (doi:10.3390/cells11132005), 2022-06-23
Supplement: s1 [file s1]

## Supplementary Table S1

### TaqMan assays for the selected genes validated with qRT-PCR.

| Tissue                 | Gene            | TaqMan assay  |
|------------------------|-----------------|---------------|
| <b>Adipose tissue</b>  |                 |               |
|                        | <i>ACADS</i>    | Hs00916595_g1 |
|                        | <i>ADIPOQ</i>   | Hs00605917_m1 |
|                        | <i>ATP5B</i>    | Hs00969569_m1 |
|                        | <i>ATP5H</i>    | Hs01046889_gH |
|                        | <i>CD68</i>     | Hs02836816_g1 |
|                        | <i>COL5A1</i>   | Hs00609140_m1 |
|                        | <i>COL6A2</i>   | Hs00242484_m1 |
|                        | <i>COX5A</i>    | Hs01561737_g1 |
|                        | <i>FH</i>       | Hs00895616_m1 |
|                        | <i>HADH</i>     | Hs00997450_m1 |
|                        | <i>LAMA2</i>    | Hs01124081_m1 |
|                        | <i>NDUFB8</i>   | Hs00428204_m1 |
|                        | <i>PPARGC1A</i> | Hs01016719_m1 |
|                        | <i>SDHD</i>     | Hs00829723_g1 |
|                        | <i>UQCRC2</i>   | Hs00996395_m1 |
| Reference gene         | <i>ACTB</i>     | Hs01060665_g1 |
| <b>Skeletal muscle</b> |                 |               |
|                        | <i>ACADVL</i>   | Hs00817723_g1 |
|                        | <i>ACVR2B</i>   | Hs00609603_m1 |
|                        | <i>ADIPOR1</i>  | Hs00360422_m1 |
|                        | <i>ADIPOR2</i>  | Hs00226105_m1 |
|                        | <i>ATP5A1</i>   | Hs00900735_m1 |
|                        | <i>COX5B</i>    | Hs00426948_m1 |
|                        | <i>CPT1B</i>    | Hs00992664_m1 |
|                        | <i>CS</i>       | Hs02574374_s1 |
|                        | <i>ETFA</i>     | Hs00164511_m1 |
|                        | <i>FBXO32</i>   | Hs01041408_m1 |
|                        | <i>FOXO3</i>    | Hs00818121_m1 |
|                        | <i>HADH</i>     | Hs00193428_m1 |
|                        | <i>MEF2C</i>    | Hs00231149_m1 |
|                        | <i>MSTN</i>     | Hs00976237_m1 |
|                        | <i>MYF5</i>     | Hs00271574_m1 |
|                        | <i>MYF6</i>     | Hs00231165_m1 |
|                        | <i>MYH1</i>     | Hs00428600_m1 |
|                        | <i>MYH2</i>     | Hs00430042_m1 |
|                        | <i>MYH7</i>     | Hs01110632_m1 |
|                        | <i>MYOD1</i>    | Hs00159528_m1 |

|                |                 |               |
|----------------|-----------------|---------------|
|                | <i>MYOG</i>     | Hs01072232_m1 |
|                | <i>MYOZ1</i>    | Hs00222007_m1 |
|                | <i>NDUFS1</i>   | Hs00192297_m1 |
|                | <i>PDK4</i>     | Hs01037712_m1 |
|                | <i>PGAM2</i>    | Hs00165474_m1 |
|                | <i>PPARGC1A</i> | Hs01016719_m1 |
|                | <i>PPP3CA</i>   | Hs00174223_m1 |
|                | <i>PPP3CB</i>   | Hs00236113_m1 |
|                | <i>PRKAA2</i>   | Hs00178903_m1 |
|                | <i>PRKAG3</i>   | Hs00179660_m1 |
|                | <i>PSMA2</i>    | Hs00746751_s1 |
|                | <i>PSMB3</i>    | Hs00600803_m1 |
|                | <i>PSMB6</i>    | Hs01572709_g1 |
|                | <i>PSMD1</i>    | Hs00160631_m1 |
|                | <i>SDHA</i>     | Hs00188166_m1 |
|                | <i>SMAD7</i>    | Hs00998193_m1 |
|                | <i>TRIM63</i>   | Hs00822397_m1 |
|                | <i>UQCRC1</i>   | Hs00163415_m1 |
| Reference gene | <i>IPO8</i>     | Hs00183533_m1 |
| Reference gene | <i>POLR2A</i>   | Hs00172187_m1 |
| Reference gene | <i>PPIA</i>     | Hs00172187_m1 |

## Supplementary Table S2

### Anthropometric characteristics of males and females

|                           | Obese controls | Type 2 diabetes | P-value |
|---------------------------|----------------|-----------------|---------|
| <b><i>Males (n)</i></b>   | 12             | 10              |         |
| BMI (kg/m <sup>2</sup> )  | 30.5 ± 1.0     | 29.7 ± 1.4      | 0.66    |
| Fat mass (kg)             | 29.9 ± 2.1     | 27.8 ± 2.7      | 0.55    |
| Fat free mass (kg)        | 67.2 ± 2.5***  | 66.4 ± 2.2***   | 0.80    |
| Percent fat mass (%)      | 30.7 ± 1.7***  | 28.9 ± 1.7***   | 0.47    |
| Waist circumference (cm)  | 107 ± 3        | 109 ± 4         | 0.64    |
| Hip circumference (cm)    | 106 ± 1        | 107 ± 3         | 0.84    |
| Waist-hip ratio           | 1.01 ± 0.02    | 1.02 ± 0.02*    | 0.65    |
| <b><i>Females (n)</i></b> | 7              | 7               |         |
| BMI (kg/m <sup>2</sup> )  | 30.6 ± 1.0     | 31.0 ± 1.8      | 0.85    |
| Fat mass (kg)             | 34.0 ± 3.8     | 35.7 ± 3.6      | 0.76    |
| Fat free mass (kg)        | 46.4 ± 1.6     | 47.4 ± 1.6      | 0.67    |
| Percent fat mass (%)      | 41.6 ± 2.2     | 42.3 ± 1.9      | 0.82    |
| Waist circumference (cm)  | 99 ± 4         | 97 ± 5          | 0.81    |
| Hip circumference (cm)    | 105 ± 2        | 108 ± 8         | 0.77    |
| Waist-hip ratio           | 0.94 ± 0.03    | 0.91 ± 0.04     | 0.68    |

Study participants were studied after an overnight fast. Data represent means ± SEM. \*P<0.05, \*\*P<0.01 and \*\*\*P<0.001 vs. females.

### Supplementary Table S3

#### mRNA expression of genes involved in regulation of muscle mass and substrate metabolism

| Gene            | Obese controls | Type 2 diabetes | P-value |
|-----------------|----------------|-----------------|---------|
| <i>FOXO3</i>    | 1.00 ± 0.09    | 0.77 ± 0.07     | 0.07    |
| <i>MSTN</i>     | 1.00 ± 0.17    | 1.83 ± 0.20     | 0.005   |
| <i>ACVR2B</i>   | 1.00 ± 0.06    | 1.19 ± 0.07     | 0.05    |
| <i>SMAD7</i>    | 1.00 ± 0.08    | 0.95 ± 0.06     | 0.60    |
| <i>MYOD1</i>    | 1.00 ± 0.09    | 0.78 ± 0.05     | 0.06    |
| <i>MYF5</i>     | 1.00 ± 0.06    | 1.03 ± 0.08     | 0.73    |
| <i>MYF6</i>     | 1.00 ± 0.08    | 1.08 ± 0.09     | 0.54    |
| <i>MYOG</i>     | 1.00 ± 0.07    | 0.87 ± 0.05     | 0.12    |
| <i>MYH1</i>     | 1.00 ± 0.33    | 1.82 ± 0.26     | 0.06    |
| <i>MYH2</i>     | 1.00 ± 0.10    | 0.97 ± 0.07     | 0.82    |
| <i>MYH7</i>     | 1.00 ± 0.11    | 0.96 ± 0.14     | 0.83    |
| <i>MYOZ1</i>    | 1.00 ± 0.05    | 1.02 ± 0.03     | 0.72    |
| <i>MEF2C</i>    | 1.00 ± 0.06    | 0.99 ± 0.04     | 0.87    |
| <i>PPP3CA</i>   | 1.00 ± 0.04    | 1.26 ± 0.05     | 0.0004  |
| <i>PPP3CB</i>   | 1.00 ± 0.04    | 1.09 ± 0.04     | 0.13    |
| <i>NDUFS1</i>   | 1.00 ± 0.08    | 0.91 ± 0.04     | 0.32    |
| <i>SDHA</i>     | 1.00 ± 0.07    | 0.92 ± 0.05     | 0.35    |
| <i>UQCRC1</i>   | 1.00 ± 0.06    | 0.92 ± 0.04     | 0.25    |
| <i>COX5B</i>    | 1.00 ± 0.08    | 0.93 ± 0.03     | 0.45    |
| <i>ATP5A1</i>   | 1.00 ± 0.07    | 0.94 ± 0.04     | 0.50    |
| <i>CS</i>       | 1.00 ± 0.08    | 1.06 ± 0.04     | 0.54    |
| <i>CPT1B</i>    | 1.00 ± 0.09    | 0.95 ± 0.05     | 0.59    |
| <i>ETFA</i>     | 1.00 ± 0.07    | 1.02 ± 0.03     | 0.77    |
| <i>ACACDVL</i>  | 1.00 ± 0.09    | 0.96 ± 0.08     | 0.71    |
| <i>HADH</i>     | 1.00 ± 0.05    | 1.13 ± 0.05     | 0.08    |
| <i>PGAM2</i>    | 1.00 ± 0.07    | 1.00 ± 0.05     | 0.98    |
| <i>ADIPOR1</i>  | 1.00 ± 0.04    | 0.98 ± 0.03     | 0.73    |
| <i>ADIPOR2</i>  | 1.00 ± 0.06    | 1.10 ± 0.05     | 0.36    |
| <i>PPKAA2</i>   | 1.00 ± 0.05    | 0.99 ± 0.05     | 0.90    |
| <i>PRKAG3</i>   | 1.00 ± 0.14    | 1.39 ± 0.13     | 0.06    |
| <i>PDK4</i>     | 1.00 ± 0.24    | 0.88 ± 0.27     | 0.76    |
| <i>PPARGC1A</i> | 1.00 ± 0.09    | 0.89 ± 0.05     | 0.28    |

Muscle transcript levels by qRT-PCR of genes involved in the regulation of muscle mass and substrate metabolism. Data represent means ± SEM.

## Supplementary Table S4

### Expression of pro-inflammatory adipokines and putative myokines

| Affy ID                            | Gene Symbol    | Protein Name                                          | Fold change | P-value | FDR  |
|------------------------------------|----------------|-------------------------------------------------------|-------------|---------|------|
| <i>Pro-inflammatory adipokines</i> |                |                                                       |             |         |      |
| 209496_at                          | <i>RARRES2</i> | Chemerin                                              | -1.21       | 0.02    | 0.44 |
| 203381_s_at                        | <i>APOE</i>    | Apolipoprotein E                                      | 1.14        | 0.31    | 0.86 |
| 216598_s_at                        | <i>CCL2</i>    | MCP-1                                                 | -1.11       | 0.73    | 0.96 |
| 220570_at                          | <i>RETN</i>    | Resistin                                              | 1.07        | 0.39    | 0.87 |
| 205207_at                          | <i>IL6</i>     | Interleukin 6                                         | -1.06       | 0.47    | 0.89 |
| 203980_at                          | <i>FABP4</i>   | Fatty acid binding protein 4                          | -1.06       | 0.00    | 0.17 |
| 217739_s_at                        | <i>PBEF1</i>   | Visfatin                                              | 1.02        | 0.81    | 0.97 |
| 219140_s_at                        | <i>RBP4</i>    | Retinol binding protein 4                             | -1.01       | 0.81    | 0.97 |
| 207092_at                          | <i>LEP</i>     | Leptin                                                | 1.01        | 0.94    | 0.99 |
| 205382_s_at                        | <i>CFD</i>     | Complement factor D (adipsin)                         | -1.00       | 0.94    | 0.99 |
| <i>Putative myokines</i>           |                |                                                       |             |         |      |
| 207145_at                          | <i>GDF8</i>    | Growth differentiation factor 8 (myostatin)           | 1.66        | 0.03    | 0.25 |
| 209101_at                          | <i>CTGF</i>    | Connective tissue growth factor                       | -1.28       | 0.30    | 0.62 |
| 207433_at                          | <i>IL10</i>    | Interleukin 10                                        | -1.11       | 0.15    | 0.47 |
| 206382_s                           | <i>BDNF</i>    | Brain-derived neurotrophic factor                     | -1.07       | 0.61    | 0.82 |
| 221576_at                          | <i>GDF15</i>   | Growth differentiation factor 15                      | -1.07       | 0.31    | 0.63 |
| 204421_s_at                        | <i>FGF2</i>    | Fibroblast growth factor 2 (basic)                    | -1.06       | 0.46    | 0.72 |
| 208782_at                          | <i>FSTL1</i>   | Follistatin-like 1                                    | -1.06       | 0.58    | 0.80 |
| 221009_s_at                        | <i>ANGPTL4</i> | Angiopoietin-like 4                                   | -1.06       | 0.34    | 0.65 |
| 205207_at                          | <i>IL6</i>     | Interleukin 6                                         | 1.05        | 0.47    | 0.73 |
| 221433_at                          | <i>FGF21</i>   | Fibroblast growth factor 21                           | -1.05       | 0.39    | 0.68 |
| 205266_at                          | <i>LIF</i>     | Leukemia inhibitory factor                            | 1.04        | 0.53    | 0.77 |
| 201893_x_at                        | <i>DCN</i>     | Decorin                                               | 1.04        | 0.48    | 0.74 |
| 205992_s_at                        | <i>IL15</i>    | Interleukin 15                                        | 1.04        | 0.50    | 0.75 |
| 200665_s_at                        | <i>SPARC</i>   | Secreted protein, acidic, cysteine-rich (osteonectin) | 1.03        | 0.83    | 0.93 |
| 216546_s_at                        | <i>CHI3L1</i>  | Chitinase 3-like 1 (YKL40)                            | -1.01       | 0.93    | 0.97 |

The microarray data set was explored to identify possible changes in expression of pro-inflammatory adipokines in SAT and putative myokines in muscle of patients with T2D compared with overweight/obese controls. In this table the probe sets with the highest expression are shown. P-values are unadjusted. An FDR<0.1 is considered significant.
